# Supplementary material for: An antibody-drug conjugate with intracellular drug release properties showing specific cytotoxicity against CD7-positive cells
Source: PubMed Central journal article supplement — Leuk Res. 2021 Sep;108:None. doi: 10.1016/j.leukres.2021.106626 (PMC8443841; doi:10.1016/j.leukres.2021.106626), 2021-09
Supplement: mmc1.pdf [file mmc1.pdf]

# Supplementary Figure 1



## Supplementary Figure 1. Analysis of anti-CD7 Ab and structure of anti-CD7-PermaLink-MMAE ADC.

A. SDS-PAGE analysis of purified anti-CD7. L, protein ladder; Ab, purified anti-CD7 sample. B. Illustration of anti-CD7-MMAE ADC. The conjugated drugs are shown as red hexagons. C. The structure of the payload of anti-CD7 ADC consisting of the cytotoxic drug monomethyl auristatin E (MMAE), a p-aminobenzyl (PAB) spacer, a valine-citrulline cleavable linker and PermaLink<sup>®</sup> conjugation chemistry.

## Supplementary Figure 2



### Supplementary Figure 2. Anti-CD7, anti-Her2 and anti-CD7-MMAE antibody binding to CD7 and Her2 on cell surface

Cells tested in the *in vitro* ADC cytotoxicity experiments were analyzed for cell surface expression of CD7 and Her2 using commercial anti-CD7 (FITC labeled), anti-CD7 IgG, anti-CD7-MMAE ADC and anti-Her2-MMAE ADC. Alexa Fluor 488 labeled goat-anti-human IgG was used for the secondary staining of samples stained with anti-CD7 IgG, anti-CD7-MMAE ADC and anti-Her2-MMAE ADC.

## Supplementary Figure 3



### **Supplementary Figure 3. PLRP analysis of the anti-CD7 antibody and ADC.**

The unconjugated anti-CD7 antibody and drug conjugated anti-CD7 ADC were analysed using PLRP as described in the materials and methods section. Peaks exhibiting a different drug loading are labelled with numbers 0-3. HC: heavy chain; LC: light chain. The DAR was estimated to be 2.6

# Supplementary Figure 4



**Supplementary Figure 4. Normalized bodyweight of male athymic nude mice dosed with anti-CD7 or anti-CD7-MMAE.**

Values shown are mean  $\pm$ SEM; n=5 for all groups.

## Supplementary Figure 5. Sequence of anti-CD7-expressing vectors

The VH and VL of anti-CD7 were amplified using PCR from the vector pET26b anti-CD7 scFv and cloned into VHEXpress and VKExpress vectors.

Panel A. The DNA sequence and the translated amino acid sequence of anti-CD7 single chain Fv.

Panel B. The sequence of pET26b anti-CD7 scFv plasmid. The DNA sequence and the translated amino acid sequence of anti-CD7 scFv are shown in red.

Panel C. The sequence of VKExpress anti-CD7 VL plasmid. The DNA sequence and the translated amino acid sequence of anti-CD7 VL are shown in red. The exon sequence of CL and the translated amino acid sequence are shown in blue.

Panel D. The sequence of VHEXpress anti-CD7 VH plasmid. The DNA sequence and the translated amino acid sequence of anti-CD7 VH are shown in red. The exon sequence of CH and the translated amino acid sequence are shown in blue.

### A. Sequence of anti-CD7 scFv

```
atgaaatacctattgcctacggcagccgctggattggttattactcgcggcccagccggcc
M K Y L L P T A A A G L L L L A A Q P A
atggcggcctacaaagatatccagatgacacagactacatcctccctgtctgcctctctg
M A A Y K D I Q M T Q T T S S L S A S L
ggagacagagtcaccatcagttgcagtgcaagtcagggcattagcaattatTTAAactgg
G D R V T I S C S A S Q G I S N Y L N W
tatcagcagaaaaccagatggaactgtTAAactcctgatctattacacatcaagtttacac
Y Q Q K P D G T V K L L I Y Y T S S L H
tcaggagtcccacaggttcagtgggcagtggggtctgggacagattattctctcaccatc
S G V P S R F S G S G S G T D Y S L T I
agcaacctggaacctgaagatattgccacttattattgtcagcagtatagcaagcttccg
S N L E P E D I A T Y Y C Q Q Y S K L P
tacacgttccggaggggggaccaagctggaaataaaaacgtgggtgggtgggttctgggtgg
Y T F G G G T K L E I K R G G G G S G G
ggtggttctggcggcggcggctccgggtgggtggatccgaggtgcaactggtggagtct
G G S G G G S G G G G S E V Q L V E S
gggggaggccttagtgaagcctgggggggtccctgaaactctcctgtgcagcctctggactc
G G G L V K P G G S L K L S C A A S G L
actttcagtagctatgccatgtcttgggttcgccagactccagagaagaggctggagtgg
T F S S Y A M S W V R Q T P E K R L E W
gtcgcattccattagtagtggtggtttcacctactatccagacagtggtgaagggccgattc
V A S I S S G G F T Y Y P D S V K G R F
accatctccagagataatgccaggaacatcctgtatctgcaaatagagcagtgctgaggtct
T I S R D N A R N I L Y L Q M S S L R S
gaggacacggccatgtattactgtgcaagagacgaggtacgggggtacctcgatgtctgg
E D T A M Y Y C A R D E V R G Y L D V W
ggcgcagggaccacgggtcaccggttccctcggcctcggggggccgatcaccatcatcaccat
G A G T T V T V S S A S G A D H H H H H
cattgctagtaa
H C - -
```



< ANTI-CD7 SCFV

730 740 750 760 770 780  
GTGAGAGAATAATCTGTCCCAGACCCACTGCCACTGAACCTTGATGGGACTCCTGAGTGT  
<T L S Y D T G S G S G S F R S P V G S H

< ANTI-CD7 SCFV

790 800 810 820 830 840  
AAACTTGATGTGTAATAGATCAGGAGTTTAAACAGTTCCATCTGGTTTCTGCTGATACCAG  
<L S S T Y Y I L L K V T G D P K Q Q Y W

< ANTI-CD7 SCFV

850 860 870 880 890 900  
TTTAAATAATTGCTAATGCCCTGACTTGCACTGCAACTGATGGTACTCTGTCTCCAGA  
<N L Y N S I G Q S A S C S I T V R D G L

< ANTI-CD7 SCFV

910 920 930 940 950 960  
GAGGCAGACAGGGAGGATGTAGTCTGTGTCTGATCTGGATATCTTTGTAGGCCGCCATGGCC  
<S A S L S S T T Q T M Q I D K Y A A M A

< ANTI-CD7 SCFV

970 980 990 1000 1010 1020  
GGCTGGGCCGCGAGTAATAACAATCCAGCGGCTGCCGTAGGCAATAGGTATTTCATATGT  
<P Q A A L L L L G A A A T P L L Y K M

< ANTI-CD7 SCFV

1030 1040 1050 1060 1070 1080  
ATATCTCCTTCTTAAAGTTAAACAAAATTATTTCTAGAGGGGAATTGTTATCCGCTCACA

1090 1100 1110 1120 1130 1140  
ATCCCCCTATAGTGAGTCGTATTAATTTTCGCGGGATCGAGATCTCGATCCTCTACGCCGG

1150 1160 1170 1180 1190 1200  
ACGCATCGTGGCCGGCATCACCGGCCACAGGTGCGGTTGCTGGCGCCTATATCGCCGA

1210 1220 1230 1240 1250 1260  
CATCACCGATGGGGAAGATCGGGCTCGCCACTTCGGGCTCATGAGCGCTTGTTCGGCGT

1270 1280 1290 1300 1310 1320  
GGGTATGGTGGCAGGCCCGTGGCCGGGGACTGTTGGGCGCCATCTCCTTGCATGCACC

1330 1340 1350 1360 1370 1380  
ATTCCTTGCGGCGGCGGTGCTCAACGGCCTCAACCTACTACTGGGCTGCTTCCTAATGCA

1390 1400 1410 1420 1430 1440  
GGAGTCGCATAAGGGAGAGCGTCGAGATCCCGGACACCATCGAATGGCGCAAAACCTTTC

1450 1460 1470 1480 1490 1500  
GCGGTATGGCATGATAGCGCCCGGAAGAGAGTCAATTCAGGGTGGTGAATGTGAAACCAG

1510 1520 1530 1540 1550 1560  
TAACGTTATACGATGTCGAGAGTATGCCGGTGTCTTATCAGACCGTTTCCCGCGTGG

1570 1580 1590 1600 1610 1620  
TGAACCAGGCCAGCCACGTTTCTGCGAAAACGCGGGAAAAAGTGAAGCGGCGATGGCGG

1630 1640 1650 1660 1670 1680  
AGCTGAATTACATTCCCAACCGCGTGGCACAACAACCTGGCGGGCAAACAGTCGTTGCTGA

1690 1700 1710 1720 1730 1740  
TTGGCGTTGCCACCTCCAGTCTGGCCCTGCACGCGCCGTCGCAAATTGTCGCGGCGATTA

1750 1760 1770 1780 1790 1800  
AATCTCGCGCCGATCAACTGGGTGCCAGCGTGGTGGTGTGCGATGGTAGAACGAAGCGGCG

1810 1820 1830 1840 1850 1860  
TCGAAGCCTGTAAAGCGGCGGTGCACAATCTTCTCGCGCAACGCGTCAGTGGGCTGATCA

1870 1880 1890 1900 1910 1920  
TTAACTATCCGCTGGATGACCAGGATGCCATTGCTGTGGAAGCTGCCTGCACTAATGTTC

1930 1940 1950 1960 1970 1980  
CGGCGTTATTTCTTGATGTCTCTGACCAGACACCCATCAACAGTATTATTTTCTCCCATG

1990 2000 2010 2020 2030 2040  
AAGACGGTACGCGACTGGGCGTGGAGCATCTGGTCGCATTGGGTCACCAGCAAATCGCGC

2050 2060 2070 2080 2090 2100  
TGTTAGCGGGCCCATTAAGTTCTGTCTCGGCGCGTCTGCGTCTGGCTGGCTGGCATAAAT

2110 2120 2130 2140 2150 2160  
ATCTCACTCGCAATCAAATTCAGCCGATAGCGGAACGGGAAGGCGACTGGAGTGCCATGT

2170 2180 2190 2200 2210 2220  
CCGGTTTTCAACAAACCATGCAAATGCTGAATGAGGGCATCGTTCCCACTGCGATGCTGG

2230 2240 2250 2260 2270 2280  
TTGCCAACGATCAGATGGCGCTGGGCGCAATGCGCGCCATTACCGAGTCCGGGCTGCGCG

2290 2300 2310 2320 2330 2340  
TTGGTGCGGATATCTCGGTAGTGGGATACGACGATACCGAAGACAGCTCATGTTATATCC

2350 2360 2370 2380 2390 2400  
CGCCGTTAACACCATCAAACAGGATTTTCGCTGCTGGGGCAAACCAGCGTGGACCCT

2410 2420 2430 2440 2450 2460  
TGCTGCAACTCTCTCAGGGCCAGGCGGTGAAGGGCAATCAGCTGTTGCCCGTCTCACTGG

2470 2480 2490 2500 2510 2520  
TGAAAAGAAAAACCACCCTGGCGCCAATACGCAAACCGCCTCTCCCCGCGCGTTGGCCG

2530 2540 2550 2560 2570 2580  
ATTCATTAATGCAGCTGGCACGACAGGTTTCCCGACTGGAAAGCGGGCAGTGAGCGCAAC

2590 2600 2610 2620 2630 2640  
GCAATTAATGTAAGTTAGCTCACTCATTAGGCACCGGGATCTCGACCGATGCCCTTGAGA

2650 2660 2670 2680 2690 2700  
GCCTTCAACCCAGTCAGCTCCTTCCGGTGGGCGCGGGGCATGACTATCGTCGCCGCACTT

2710 2720 2730 2740 2750 2760  
ATGACTGTCTTCTTTATCATGCAACTCGTAGGACAGGTGCCGGCAGCGCTCTGGGTCATT

2770 2780 2790 2800 2810 2820  
TTCGGCGAGGACCGCTTTCGCTGGAGCGCGACGATGATCGGCCTGTCGCTTGCGGTATTC

2830 2840 2850 2860 2870 2880  
GGAATCTTGACGCCCTCGCTCAAGCCTTCGTCCTGGTCCCGCCACCAAACGTTTCGGC

2890 2900 2910 2920 2930 2940  
GAGAAGCAGGCCATTATCGCCGGCATGGCGGGCCCCACGGGTGCGCATGATCGTGCTCCTG

2950 2960 2970 2980 2990 3000  
TCGTTGAGGACCCGGCTAGGCTGGCGGGGTTGCCTTACTGGTTAGCAGAATGAATCACCG

3010 3020 3030 3040 3050 3060  
ATACGCGAGCGAACGTGAAGCGACTGCTGCTGCAAAACGTCTGCGACCTGAGCAACAACA

3070 3080 3090 3100 3110 3120  
TGAATGGTCTTCGGTTTTCCGTGTTTTCGTAAAGTCTGGAAACGCGGAAGTCAGCGCCCTGC

3130 3140 3150 3160 3170 3180  
ACCATTATGTTCCGGATCTGCATCGCAGGATGCTGCTGGCTACCCTGTGGAACACCTACA

3190 3200 3210 3220 3230 3240  
TCTGTATTAACGAAGCGCTGGCATTGACCCTGAGTGATTTTTCTCTGGTCCCGCCGCATC

3250 3260 3270 3280 3290 3300  
CATACCGCCAGTTGTTTACCCTCACAAACGTTCCAGTAACCGGGCATGTTTCATCATCAGTA

3310 3320 3330 3340 3350 3360  
ACCCGTATCGTGAGCATCCTCTCTCGTTTTCATCGGTATCATTACCCCATGAACAGAAAT

3370 3380 3390 3400 3410 3420  
CCCCCTTACACGGAGGCATCAGTGACCAAACAGGAAAAAACCGCCCTTAACATGGCCCCG

3430 3440 3450 3460 3470 3480  
TTTATCAGAAGCCAGACATTAACGCTTCTGGAGAAACTCAACGAGCTGGACGCGGATGAA

3490 3500 3510 3520 3530 3540  
CAGGCAGACATCTGTGAATCGCTTACGACCACGCTGATGAGCTTTACCGCAGCTGCCTC

3550 3560 3570 3580 3590 3600  
GCGCGTTTTCCGGTATGACGGTGAAAACCTCTGACACATGCAGCTCCCGGAGACGGTCACA

3610 3620 3630 3640 3650 3660  
GCTTGTCTGTAAGCGGATGCCGGGAGCAGACAAGCCCGTCAGGGCGCGTCAGCGGGTGT

3670 3680 3690 3700 3710 3720  
GGCGGGTGTGGGGCGCAGCCATGACCCAGTCACGTAGCGATAGCGGAGTGATACTGGC

3730 3740 3750 3760 3770 3780  
TTAACTATGCGGCATCAGAGCAGATTGTAAGTGCAGAGTGCACCATATATGCGGTGTGAAAT

3790 3800 3810 3820 3830 3840  
ACCGCACAGATGCGTAAGGAGAAAATACCGCATCAGGCGCTCTTCCGCTTCCTCGCTCAC

3850 3860 3870 3880 3890 3900  
TGACTCGCTGCGCTCGGTGTTCCGGCTGCGGGCAGCGGTATCAGCTCACTCAAAGCGGT

3910 3920 3930 3940 3950 3960  
AATACGGTTATCCACAGAATCAGGGGATAACGCAGGAAAGAACATGTGAGCAAAAGGCCA

3970 3980 3990 4000 4010 4020  
GCAAAAGGCCAGGAACCGTAAAAAGGCCGCGTTGCTGGCGTTTTTCCATAGGCTCCGCC

4030 4040 4050 4060 4070 4080  
CCCTGACGAGCATCACAAAAATCGACGCTCAAGTCAGAGGTGGCGAAACCCGACAGGACT

4090 4100 4110 4120 4130 4140  
ATAAAGATAACCAGGCGTTTTCCCCTGGAAGCTCCCTCGTGCCTCTCCTGTTCCGACCCT

4150 4160 4170 4180 4190 4200  
GCCGCTTACCGGATACCTGTCCGCTTTCTCCCTTCGGGAAGCGTGGCGCTTTCTCATAG

4210 4220 4230 4240 4250 4260  
CTCACGCTGTAGGTATCTCAGTTCGGTGTAGGTCGTTTCGCTCCAAGCTGGGCTGTGTGCA

4270 4280 4290 4300 4310 4320  
CGAACCCCCCGTTCAGCCCCGACCGCTGCGCCTTATCCGGTAACTATCGTCTTGAGTCCAA

4330 4340 4350 4360 4370 4380  
CCCGGTAAGACACGACTTATCGCCACTGGCAGCAGCCACTGGTAACAGGATTAGCAGAGC

4390 4400 4410 4420 4430 4440  
GAGGTATGTAGGCGGTGCTACAGAGTTCCTGAAGTGGTGGCCTAACTACGGCTACACTAG

4450 4460 4470 4480 4490 4500  
AAGGACAGTATTTGGTATCTGCGCTCTGCTGAAGCCAGTTACCTTCGGAAAAAGAGTTGG

4510 4520 4530 4540 4550 4560  
TAGCTCTTGATCCGGCAAACAAACCACCGCTGGTAGCGGTGGTTTTTTTTGTTTGCAAGCA

4570 4580 4590 4600 4610 4620  
GCAGATTACGCGCAGAAAAAAGGATCTCAAGAAGATCCTTTGATCTTTTCTACGGGGTC

4630 4640 4650 4660 4670 4680  
TGACGCTCAGTGGAAACGAAAACCTCACGTTAAGGGATTTTGGTCATGAACAATAAACTGT

4690 4700 4710 4720 4730 4740  
CTGCTTACATAAACAGTAATACAAGGGGTGTTATGAGCCATATTCAACGGGAAACGTCTT

4750 4760 4770 4780 4790 4800  
GCTCTAGGCCGCGATTAAATTCCAACATGGATGCTGATTTATATGGGTATAAATGGGCTC

4810 4820 4830 4840 4850 4860  
GCGATAATGTCGGCAATCAGGTGCGACAATCTATCGATTGTATGGGAAGCCCCGATGCGC

4870 4880 4890 4900 4910 4920  
CAGAGTTGTTTTCTGAAACATGGCAAAGGTAGCGTTGCCAATGATGTTACAGATGAGATGG

4930 4940 4950 4960 4970 4980  
TCAGACTAAACTGGCTGACGGAATTTATGCCTCTTCCGACCATCAAGCATTTTATCCGTA

4990 5000 5010 5020 5030 5040  
CTCCTGATGATGCATGGTTACTACCACTGCGATCCCCGGGAAAACAGCATTCCAGGTAT

5050 5060 5070 5080 5090 5100  
TAGAAGAATATCCTGATTCAGGTGAAAATATTGTTGATGCGCTGGCAGTGTTCTCGGCC

5110 5120 5130 5140 5150 5160  
GGTTGCATTCGATTCCTGTTTGTAAATTGTCCTTTAACAGCGATCGCGTATTTCTGCTCG

5170 5180 5190 5200 5210 5220  
CTCAGGCGCAATCACGAATGAATAACGGTTTTGGTTGATGCGAGTGATTTTGATGACGAGC

5230 5240 5250 5260 5270 5280  
GTAATGGCTGGCCTGTTGAACAAGTCTGGAAAGAAATGCATAAACTTTTGCCATTCTCAC

5290 5300 5310 5320 5330 5340  
CGGATTCAGTCGTCACCTCATGGTGATTTCTCACTTGATAACCTTATTTTTGACGAGGGGA

5350 5360 5370 5380 5390 5400  
AATTAATAGTTGTATTGATGTTGGACGAGTCGGAATCGCAGACCGATACCAGGATCTTG

5410 5420 5430 5440 5450 5460  
CCATCCTATGGAAGTGCCTCGGTGAGTTTTCTCCTTCATTACAGAAACGGCTTTTTCAA

5470 5480 5490 5500 5510 5520  
AATATGGTATTGATAATCCTGATATGAATAAATTGCAGTTTCATTTGATGCTCGATGAGT

5530 5540 5550 5560 5570 5580  
TTTTCTAAGAATTAATTCATGAGCGGATACATATTTGAATGTATTTAGAAAAATAAACAA

5590 5600 5610 5620 5630 5640  
ATAGGGGTTCCGCGCACATTTCCCCGAAAAGTGCCACCTGAAATTGTAAACGTTAATATT

5650 5660 5670 5680 5690 5700  
TTGTTAAAATTCGCGTTAAATTTTTGTAAATCAGCTCATTTTTTAACCAATAGGCCGAA

5710 5720 5730 5740 5750 5760  
ATCGGCAAAATCCCTTATAAATCAAAGAATAGACCGAGATAGGGTTGAGTGTTGTTCCA

5770 5780 5790 5800 5810 5820  
GTTTGAACAAGAGTCCACTATTAAGAACGTGGACTCCAACGTCAAAGGGCGAAAAACC

5830 5840 5850 5860 5870 5880  
GTCTATCAGGGCGATGGCCACTACGTGAACCATCACCTAATCAAGTTTTTTGGGGTCCG

5890 5900 5910 5920 5930 5940  
AGGTGCCGTAAAGCACTAAATCGGAACCCTAAAGGGAGCCCCGATTTAGAGCTTGACGG

5950 5960 5970 5980 5990 6000  
GGAAAGCCGGCGAACGTGGCGAGAAAGGAAGGAAGAAAGCGAAAGGAGCGGGCGCTAGG

6010 6020 6030 6040 6050 6060  
GCGCTGGCAAGTGTAGCGGTACGCTGCGCGTAACCACCACACCCGCCGCGCTTAATGCG

6070 6080  
CCGCTACAGGGCGCGTCCCATTGCGCA

### C. Sequence of VKExpress anti-CD7 VL plasmid

```
      10      20      30      40      50      60
CATGAAATACCTATTGCCTACGGCAGCCGCTGGATTGTTATTACTCGCGGCCAGCCGGC
  M K Y L L P T A A A G L L L L A A Q P A >
      ANTI-CD7 VL >

      70      80      90      100     110     120
CATGGCGGCCTACAAAGATATCCAGATGACACAGACTACATCCTCCCTGTCTGCCTCTCT
  M A A Y K D I Q M T Q T T S S L S A S L >
      ANTI-CD7 VL >

     130     140     150     160     170     180
GGGAGACAGAGTCACCATCAGTTGCAGTGAAGTCAGGGCATTAGCAATTATTTAAACTG
  G D R V T I S C S A S Q G I S N Y L N W >
      ANTI-CD7 VL >

     190     200     210     220     230     240
GTATCAGCAGAAACCAGATGGAAGTGTAAACTCCTGATCTATTACACATCAAGTTTACA
  Y Q Q K P D G T V K L L I Y Y T S S L H >
      ANTI-CD7 VL >

     250     260     270     280     290     300
CTCAGGAGTCCCATCAAGGTTTCAGTGGCAGTGGGTCTGGGACAGATTATTCTCTCACCAT
  S G V P S R F S G S G S G T D Y S L T I >
      ANTI-CD7 VL >

     310     320     330     340     350     360
CAGCAACCTGGAACCTGAAGATATTGCCACTTATTATTGTCAGCAGTATAGCAAGCTTCC
  S N L E P E D I A T Y Y C Q Q Y S K L P >
      ANTI-CD7 VL >

     370     380     390     400     410     420
GTACACGTTCCGAGGGGGGACCAAGCTGGAATAAAACGTGTGAGTAGAATAGATCTAA
  Y T F G G G T K L E I K R >
      ANTI-CD7 VL >

     430     440     450     460     470     480
CTTAATTAAGGAATAGGGGAAGCTAGGAAGAACTCAAAACATCAAGATTTTAAATACGC

     490     500     510     520     530     540
TTCTTGGTCTCCTTGCTATAATTATCTGGGATAAGCATGCTGTTTTCTGTCTGTCCCTAA

     550     560     570     580     590     600
CATGCCCTGTGATTATCCGCAAACAACACACCCAAGGGCAGAACCTTTGTTACTTAAACAC

     610     620     630     640     650     660
CATCCTGTTTGCTTCTTTCTCAGGAAGTGTGGCTGCACCATCTGTCTTCATCTTCCCGC
  T V A A P S V F I F P >

     670     680     690     700     710     720
CATCTGATGAGCAGTTGAAATCTGGAAGTGCCTCTGTTGTGTGCCTGCTGAATAACTTCT
  P S D E Q L K S G T A S V V C L L N N F >

     730     740     750     760     770     780
ATCCCAGAGAGGCCAAAGTACAGTGAAGGTGGATAACGCCCTCCAATCGGGTAACTCCC
```

Y P R E A K V Q W K V D N A L Q S G N S >  
790 800 810 820 830 840  
AGGAGAGTGTACAGAGCAGGACAGCAAGGACAGCACCTACAGCCTCAGCAGCACCCCTGA  
Q E S V T E Q D S K D S T Y S L S S T L >  
850 860 870 880 890 900  
CGCTGAGCAAAGCAGACTACGAGAAACACAAAGTCTACGCCTGCGAAGTCACCCATCAGG  
T L S K A D Y E K H K V Y A C E V T H Q >  
910 920 930 940 950 960  
GCCTGAGTTCACCGGTGACAAAGAGCTTCAACAGGGGAGAGTGTTAGAGGGACTAGTGCC  
G L S S P V T K S F N R G E C \* >  
970 980 990 1000 1010 1020  
CCCACCTGCTCCTCAGTTCAGCCTGACCCCTCCCATCCTTTGGCCTCTGACCCTTTTT  
1030 1040 1050 1060 1070 1080  
CCACAGGGGACCTACCCCTATTGCGGTCTCCAGCTCATCTTTCACCTCACCCCTCCT  
1090 1100 1110 1120 1130 1140  
CCTCCTTGGCTTTAATTATGCTAATGTTGGAGGAGAATGAATAAATAAAGTGAATCTTTG  
1150 1160 1170 1180 1190 1200  
CACCTGTGGTTTTCTCTCTTTCCTCATTTAATAATTATTATCTGTTGTTTTACCAACTACT  
1210 1220 1230 1240 1250 1260  
CAATTTCTTTATAAGGGACTAAATATGTAGTCATCCTAAGGCGCATAACCATTTATAAA  
1270 1280 1290 1300 1310 1320  
AATCATCCTTCATTCTATTTACCCTATCATCCTCTGCAAGACAGTCCTCCCTCAAACCCA  
1330 1340 1350 1360 1370 1380  
CAAGCCTTCTGTCTCACAGTCCCCCTGGGCCGTGGTAGGAGAGACTTGCTTCCTTGTTT  
1390 1400 1410 1420 1430 1440  
TCCCCTCCTCAGCAAGCCCTCATAGTCCTTTTTAAGGGTGACAGGTCTTACGGTCATATA  
1450 1460 1470 1480 1490 1500  
TCCTTTGATTCAATAAGCTTGGTACCAGCCCGGGCACGCGTCAGTCTAGAAGCTCGCTGA  
1510 1520 1530 1540 1550 1560  
TCAGCCTCGACTGTGCCTTCTAGTTGCCAGCCATCTGTTGTTTGCCCTCCCCCGTGCCT  
1570 1580 1590 1600 1610 1620  
TCCTTGACCCTGGAAGGTGCCACTCCCCTGTCCTTTCCTAATAAAATGAGGAAATTGCA  
1630 1640 1650 1660 1670 1680  
TCGCATTGTCTGAGTAGGTGTCATTCTATTCTGGGGGGTGGGGTGGGGCAGGACAGCAAG  
1690 1700 1710 1720 1730 1740  
GGGGAGGATTGGGAAGACAATAGCAGGCATGCTGGGGATGGCCCGGGCTCTATGGCTTCT  
1750 1760 1770 1780 1790 1800  
GAGGCGGAAAGAACCAGCTGGGGCTCTAGGGGTATCCCCACGCGCCCTGTAGCGGCGCA  
1810 1820 1830 1840 1850 1860

TTAAGCGCGGGGTGTGGTGGTTACGCGCAGCGTGACCGCTACACTTGCCAGCGCCCTA

1870 1880 1890 1900 1910 1920  
GCGCCCGCTCCTTTTCGCTTTCTTCCCTTCTCGCCACGTTTCGCCGGCTTTCCCGT

1930 1940 1950 1960 1970 1980  
CAAGCTCTAAATCGGGGCATCCCTTTAGGGTTCCGATTTAGTGCTTTACGGCACCTCGAC

1990 2000 2010 2020 2030 2040  
CCCAAAAACTTGATTAGGGTGATGGTTCACGTAGTGGGCCATCGCCCTGATAGACGGTT

2050 2060 2070 2080 2090 2100  
TTTCGCCCTTTGACGTTGGAGTCCACGTTCTTTAATAGTGGACTCTTGTTCCAACTGGA

2110 2120 2130 2140 2150 2160  
ACAACACTCAACCCTATCTCGGTCTATTCTTTTGATTTATAAGGGATTTTGGGGATTTTCG

2170 2180 2190 2200 2210 2220  
GCCTATTGGTTAAAAAATGAGCTGATTTAACAAAAATTTAACGCGAATTAATTCTGTGGA

2230 2240 2250 2260 2270 2280  
ATGTGTGTCAGTTAGGGTGTGGAAAGTCCCCAGGCTCCCCAGGCAGGCAGAAGTATGCAA

2290 2300 2310 2320 2330 2340  
AGCATGCATCTCAATTAGTCAGCAACCAGGTGTGGAAAGTCCCCAGGCTCCCCAGCAGGC

2350 2360 2370 2380 2390 2400  
AGAAGTATGCAAAGCATGCATCTCAATTAGTCAGCAACCATAGTCCCGCCCCTAACTCCG

2410 2420 2430 2440 2450 2460  
CCCATCCCGCCCCTAACTCCGCCAGTTCGCCCATTTCTCGCCCCTAGGCTGACTAATT

2470 2480 2490 2500 2510 2520  
TTTTTTATTTATGCAGAGGCCGAGGCCGCCTCTGCCTCTGAGCTATTCCAGAAGTAGTGA

2530 2540 2550 2560 2570 2580  
GGAGGCTTTTTTGGAGGCCTAGGCTTTTGCAAAAAGCTCCCGGGCCACCATGAGCGAAAA

2590 2600 2610 2620 2630 2640  
ATACATCGTCACCTGGGACATGTTGCAGATCCATGCACGTAAACTCGCAAGCCGACTGAT

2650 2660 2670 2680 2690 2700  
GCCTTCTGAACAATGGAAAGGCATTATTGCCGTAAGCCGTGGCGGTCTGGTACCGGGTGC

2710 2720 2730 2740 2750 2760  
GTTACTGGCGCGTGAACCTGGGTATTCGTCATGTCGATACCGTTTGTATTTCCAGCTACGA

2770 2780 2790 2800 2810 2820  
TCACGACAACCAGCGGAGCTTAAAGTGCTGAAACGCGCAGAAGGCGATGGCGAAGGCTT

2830 2840 2850 2860 2870 2880  
CATCGTTATTGATGACCTGGTGGATACCGGTGGTACTGCGGTTGCGATTTCGTGAAATGTA

2890 2900 2910 2920 2930 2940  
TCCAAAAGCGCACTTTGTCAACCATCTTCGCAAAACCGGCTGGTCGTCCGCTGGTTGATGA

2950 2960 2970 2980 2990 3000

CTATGTTGTTGATATCCCGCAAGATACCTGGATTGAACAGCCGTGGGATATGGGCGTCGT  
3010 3020 3030 3040 3050 3060  
ATTCGTCCC GCCAATCTCCGGTCGCTAATCTTTTCGAAATGACCGACCAAGCGACGCCCA  
3070 3080 3090 3100 3110 3120  
ACCTGCCATCACGAGATTTTCGATTCCACCGCCGCTTCTATGAAAGGTTGGGCTTCGGAA  
3130 3140 3150 3160 3170 3180  
TCGTTTTCCGGGACGCCGGCTGGATGATCCTCCAGCGCGGGATCTCATGCTGGAGTTCT  
3190 3200 3210 3220 3230 3240  
TCGCCCACCCCAACTTGTTTATTGCAGCTTATAATGGTTACAAATAAAGCAATAGCATCA  
3250 3260 3270 3280 3290 3300  
CAAATTTACAAATAAAGCATTTTTTTCACTGCATTCTAGTTGTGGTTTGTCCAAACTCA  
3310 3320 3330 3340 3350 3360  
TCAATGTATCTTATCATGTCTGTATACCGGATCTTTCCGCTTCTCGCTCACTGACTCGC  
3370 3380 3390 3400 3410 3420  
TGCGCTCGGTGCTTCGGCTGCGGCGAGCGGTATCAGCTCACTCAAAGGCGGTAATACGGT  
3430 3440 3450 3460 3470 3480  
TATCCACAGAATCAGGGGATAACGCAGGAAAGAACATGTGAGCAAAAGGCCAGCAAAAGG  
3490 3500 3510 3520 3530 3540  
CCAGGAACCGTAAAAAGGCCGCGTTGCTGGCGTTTTTCCATAGGCTCCGCCCCCTGACG  
3550 3560 3570 3580 3590 3600  
AGCATCACAAAAATCGACGCTCAAGTCAGAGGTGGCGAAACCCGACAGGACTATAAAGAT  
3610 3620 3630 3640 3650 3660  
ACCAGGCGTTTTCCCCCTGGAAGCTCCCTCGTGCGCTCTCCTGTTCCGACCCTGCCGCTTA  
3670 3680 3690 3700 3710 3720  
CCGATACCTGTCCGCTTTCTCCCTTCGGAAGCGTGGCGCTTTCTCAATGCTCACGCT  
3730 3740 3750 3760 3770 3780  
GTAGGTATCTCAGTTCGGTGTAGGTCGTTTCGCTCCAAGCTGGGCTGTGTGCACGAACCCC  
3790 3800 3810 3820 3830 3840  
CCGTTCCAGCCCAGCCGCTGCGCCTTATCCGGTAACTATCGTCTTGAGTCCAACCCGGTAA  
3850 3860 3870 3880 3890 3900  
GACACGACTTATCGCCACTGGCAGCAGCCACTGGTAACAGGATTAGCAGAGCGAGGTATG  
3910 3920 3930 3940 3950 3960  
TAGGCGGTGCTACAGAGTTCTTGAAGTGGTGGCCTAACTACGGCTACACTAGAAGGACAG  
3970 3980 3990 4000 4010 4020  
TATTTGGTATCTGCGCTCTGCTGAAGCCAGTTACCTTCGGAAAAAGAGTTGGTAGCTCTT  
4030 4040 4050 4060 4070 4080  
GATCCGGCAAACAAACCACCGCTGGTAGCGGTGGTTTTTTTTGTTTGCAAGCAGCAGATTA  
4090 4100 4110 4120 4130 4140

CGCGCAGAAAAAAGGATCTCAAGAAGATCCTTTGATCTTTTCTACGGGGTCTGACGCTC

4150 4160 4170 4180 4190 4200  
AGTGAACGAAAACCTCACGTTAAGGGATTTTGGTCATGAGATTATCAAAAAGGATCTTCA

4210 4220 4230 4240 4250 4260  
CCTAGATCCTTTTAAATTAATAATGAAGTTTTAAATCAATCTAAAGTATATATGAGTAAA

4270 4280 4290 4300 4310 4320  
CTTGGTCTGACAGTTACCAATGCTTAATCAGTGAGGCACCTATCTCAGCGATCTGTCTAT

4330 4340 4350 4360 4370 4380  
TTCGTTCCATCCATAGTTGCCTGACTCCCCGTCGTGTAGATAACTACGATACGGGAGGGCT

4390 4400 4410 4420 4430 4440  
TACCATCTGGCCCCAGTGCTGCAATGATACCGCGAGACCCACGCTCACCGGCTCCAGATT

4450 4460 4470 4480 4490 4500  
TATCAGCAATAAACAGCCAGCCGGAAGGGCCGAGCGCAGAAGTGGTCCTGCAACTTTAT

4510 4520 4530 4540 4550 4560  
CCGCCTCCATCCAGTCTATTAATTGTTGCCGGAAGCTAGAGTAAGTAGTTCGCCAGTTA

4570 4580 4590 4600 4610 4620  
ATAGTTTGCGCAACGTTGTTGCCATTGCTACAGGCATCGTGGTGTACGCTCGTCGTTTG

4630 4640 4650 4660 4670 4680  
GTATGGCTTCATTCAGCTCCGGTTCCCAACGATCAAGGCGAGTTACATGATCCCCCATGT

4690 4700 4710 4720 4730 4740  
TGTGCAAAAAAGCGGTTAGCTCCTTCGGTCTCCGATCGTTGTCAGAAGTAAGTTGGCCG

4750 4760 4770 4780 4790 4800  
CAGTGTTATCACTCATGGTTATGGCAGCACTGCATAATTCTCTTACTGTCATGCCATCCG

4810 4820 4830 4840 4850 4860  
TAAGATGCTTTTCTGTGACTGGTGAGTACTCAACCAAGTCATTCTGAGAATAGTGTATGC

4870 4880 4890 4900 4910 4920  
GGCGACCGAGTTGCTCTTGCCCGCGTCAATACGGGATAATACCGCGCCACATAGCAGAA

4930 4940 4950 4960 4970 4980  
CTTTAAAAGTGCTCATCATTGAAAACGTTCTTCGGGGCGAAAACCTCTCAAGGATCTTAC

4990 5000 5010 5020 5030 5040  
CGCTGTTGAGATCCAGTTCGATGTAACCCACTCGTGCACCCAAGTATCTTCAGCATCTT

5050 5060 5070 5080 5090 5100  
TTACTTTTACCAGCGTTTCTGGGTGAGCAAAAACAGGAAGGCAAAATGCCGCAAAAAAGG

5110 5120 5130 5140 5150 5160  
GAATAAGGGCGACACGGAAATGTTGAATACTCATACTCTTCCTTTTTCAATATTATTGAA

5170 5180 5190 5200 5210 5220  
GCATTTATCAGGGTATTGTCTCATGAGCGGATACATATTTGAATGTATTTAGAAAAATA

5230 5240 5250 5260 5270 5280

AACAAATAGGGGTTCCGCGCACATTTCCCCGAAAAGTGCCACCTGACGTCAGATCGACGG

5290 5300 5310 5320 5330 5340  
ATCGGGAGATCGGTACCTAGAATTCCGCCCGGCAGCTTCGTGAGGCTCCGGTGCCCGTCA

5350 5360 5370 5380 5390 5400  
GTGGGCAGAGCGCACATCGCCACAGTCCCCGAGAAGTTGGGGGAGGGGTCCGCAATTG

5410 5420 5430 5440 5450 5460  
AACCGGTGCCTAGAGAAGGTGGCGCGGGGTAAGTGGGAAAGTGATGTCGTGTACTGGCT

5470 5480 5490 5500 5510 5520  
CCGCCTTTTTCCCGAGGGTGGGGGAGAACCGTATATAAGTGCAGTAGTCGCCGTGAACGT

5530 5540 5550 5560 5570 5580  
TCTTTTTCGCAACGGGTTTGCCGCCAGAACACAGGTAAGTGCCGTGTGTGGTTCCCGCGG

5590 5600 5610 5620 5630 5640  
GCCTGGCCTCTTTACGGGTTATGGCCCTTGCGTGCCTTGAATTACTTCCACCTGGCTCCA

5650 5660 5670 5680 5690 5700  
GTACGTGATTCTTGATCCCGAGCTGGAGCCAGGGGCGGGCCTTGCGCTTTAGGAGCCCCT

5710 5720 5730 5740 5750 5760  
TCGCCTCGTGCTTGAGTTGAGGCCTGGCCTGGGCGCTGGGGCCCGCGTGCGAATCTGG

5770 5780 5790 5800 5810 5820  
TGGCACCTTCGCGCCTGTCTCGCTGCTTTGATAAGTCTCTAGCCATTTAAAATTTTTGA

5830 5840 5850 5860 5870 5880  
TGACCTGCTGCGACGCTTTTTTTCTGGCAAGATAGTCTTGTAATGCGGGCCAGGATCTG

5890 5900 5910 5920 5930 5940  
CACACTGGTATTTTCGGTTTTTTGGGCCCGCGGCCGGCGACGGGGCCCGTGCGTCCCAGCGC

5950 5960 5970 5980 5990 6000  
ACATGTTTCGGCGAGGCGGGCCTGCGAGCGCGGCCACCGAGAATCGGACGGGGGTAGTCT

6010 6020 6030 6040 6050 6060  
CAAGCTGGCCGGCCTGCTCTGGTGCCTGGCCTCGCGCCCGCGTGTATCGCCCCGCCCTGG

6070 6080 6090 6100 6110 6120  
GCGGCAAGGCTGGCCCGGTCGGCACCAAGTTGCGTGAGCGGAAAGATGGCCGCTTCCCGGC

6130 6140 6150 6160 6170 6180  
CCTGCTCCAGGGGGCTCAAAATGGAGGACGCGGCGCTCGGGAGAGCGGGCGGGTGAGTCA

6190 6200 6210 6220 6230 6240  
CCCACACAAAGGAAAAGGGCCTTTCCGTCTCAGCCGTGCTTTCATGTGACTCCACGGAG

6250 6260 6270 6280 6290 6300  
TACCGGGCGCCGTCCAGGCACCTCGATTAGTTCTGGAGCTTTTGGAGTACGTGCTCTTTA

6310 6320 6330 6340 6350 6360  
GGTTGGGGGAGGGGTTTTATGCGATGGAGTTTTCCCACACTGAGTGGGTGGAGACTGAA

6370 6380 6390 6400 6410 6420

GTTAGGCCAGCTTGGCACTTGATGTAATTCTCCTTGAATTTGGCCTTTTTGAGTTTGGGA

6430 6440 6450 6460 6470 6480  
TCTTGGTTTCATTCTCAAGCCTCAGACAGTGGTTCAAAGTTTTTTTCTTCCATTTTCAGGTG

6490 6500 6510 6520 6530 6540  
TCGTGAACACGTACGTACCATGGGATGGAGCTGTATCATCCTCTTCTTGGTAGCAACAGC

6550 6560 6570 6580 6590 6600  
TACAGGTAAGGGGTTAACAGTAGCAGGCTTGAGGTCTGGACATATATATGGGTGACAATG

6610 6620 6630 6640  
ACATCCACTTTGCCTTTCTCTCCACAGGCGTGCCTCCGATATCGAGCT

D. Sequence of VHExpress anti-CD7 VH plasmid

10 20 30 40 50 60  
GAGGTGCAACTGGTGGAGTCTGGGGGAGGCTTAGTGAAGCCTGGGGGGTCCCTGAAACTC  
E V Q L V E S G G G L V K P G G S L K L >  
\_\_\_\_\_ ANTI-CD7 VH \_\_\_\_\_>

70 80 90 100 110 120  
TCCTGTGCAGCCTCTGGACTCACTTTTCAGTAGCTATGCCATGTCTTGGGTTCCGCCAGACT  
S C A A S G L T F S S Y A M S W V R Q T >  
\_\_\_\_\_ ANTI-CD7 VH \_\_\_\_\_>

130 140 150 160 170 180  
CCAGAGAAGAGGCTGGAGTGGGTCGCATCCATTAGTAGTGGTGGTTTTACCTACTATCCA  
P E K R L E W V A S I S S G G F T Y Y P >  
\_\_\_\_\_ ANTI-CD7 VH \_\_\_\_\_>

190 200 210 220 230 240  
GACAGTGTGAAGGGCCGATTACCATCTCCAGAGATAATGCCAGGAACATCCTGTATCTG  
D S V K G R F T I S R D N A R N I L Y L >  
\_\_\_\_\_ ANTI-CD7 VH \_\_\_\_\_>

250 260 270 280 290 300  
CAAATGAGCAGTCTGAGGTCTGAGGACACGGCCATGTATTACTGTGCAAGAGACGAGGTA  
Q M S S L R S E D T A M Y Y C A R D E V >  
\_\_\_\_\_ ANTI-CD7 VH \_\_\_\_\_>

310 320 330 340 350 360  
CGGGGGTACCTCGATGTCTGGGGCGCAGGGACCACGGTCACCGTTTCCTCGGCCTCGGGG  
R G Y L D V W G A G T T V T V S S A S G >  
\_\_\_\_\_ ANTI-CD7 VH \_\_\_\_\_>

370 380 390 400 410 420  
GCCGATGGTGTGAGTCTGTGCGACGGATCCACCCAATGCCCATGAGCCCAGACACTGGACGC  
A D >  
\_\_\_\_\_>

430 440 450 460 470 480  
TGAACCTCGCGGACAGTTAAGAACCCAGGGGCTCTGCGCCCTGGGCCAGCTCTGTCCC

490 500 510 520 530 540  
ACACCGCGGTACATGGCACCACCTCTCTTGACAGCCTCCACCAAGGGCCCATCGGTCTTC  
A S T K G P S V F>

550 560 570 580 590 600  
CCCCTGGCACCTCTCCAAGAGCACCTCTGGGGGCACAGCGGCCCTGGGCTGCCTGGTC  
P L A P S S K S T S G G T A A L G C L V>

610 620 630 640 650 660  
AAGGACTACTTCCCCGAACCGGTGACGGTGTCTGGAAGTCAAGCGCCCTGACCAGCGGC  
K D Y F P E P V T V S W N S G A L T S G>

670 680 690 700 710 720  
GTCCACACCTTCCCGGCTGTCCTACAGTCCTCAGGACTCTACTCCCTCAGCAGCGTAGTG  
V H T F P A V L Q S S G L Y S L S S V V>

730 740 750 760 770 780  
ACCGTGCCCTCCAGCAGCTTGGGCACCCAGACCTACATCTGCAACGTGAATCACAAGCCC  
T V P S S S L G T Q T Y I C N V N H K P>

790 800 810 820 830 840  
AGCAACACCAAGGTGGACAAGAAAGTTGGTGAGAGGCCAGCACAGGGAGGGAGGGTGTCT  
S N T K V D K K V>

850 860 870 880 890 900  
GCTGGAAGCCAGGCTCAGCGCTCCTGCCTGGACGCATCCCGGCTATGCAGCCCCAGTCCA

910 920 930 940 950 960  
GGGCAGCAAGGCAGGCCCGTCTGCCTCTTACCCGGAGGCCTCTGCCGCCCCACTCAT

970 980 990 1000 1010 1020  
GCTCAGGGAGAGGGTCTTCTGGCTTTTTCCCGAGGCTCTGGGCAGGCACAGGCTAGGTGC

1030 1040 1050 1060 1070 1080  
CCCTAACCCAGGCCCTGCACACAAAGGGGCTGGTGTGGGCTCAGACCTGCCAAGAGCCA

1090 1100 1110 1120 1130 1140  
TATCCGGGAGGACCCTGCCCTGACCTAAGCCCACCCAAAGGCCAAACTCTCCACTCCC

1150 1160 1170 1180 1190 1200  
TCAGCTCGGACACCTTCTCTCCTCCAGATTCCAGTAACTCCCAATCTTCTCTCTCCAGA  
E>

1210 1220 1230 1240 1250 1260  
GCCCAAATCTTGTGACAAAACCTCACACATGCCACCGTGCCAGGTAAGCCAGCCCAGGC  
P K S C D K T H T C P P C P>

1270 1280 1290 1300 1310 1320  
CTCGCCCTCCAGCTCAAGGCGGGACAGGTGCCCTAGGGTAGCCTGCATCCAGGGACAGGC

1330 1340 1350 1360 1370 1380  
CCCAGCCGGGTGCTGACACGTCCACCTCCATCTTCTCCTCAGCACCTGAACTCCTGGGGG  
A P E L L G>

1390 1400 1410 1420 1430 1440  
GACCGTCAGTCTTCTCTTCCCCCAAACCCAAAGGACACCCTCATGATCTCCCGGACCC  
G P S V F L F P P K P K D T L M I S R T>

1450 1460 1470 1480 1490 1500  
CTGAGGTCACATGCGTGGTGGTGGACGTGAGCCACGAAGACCCTGAGGTCAAGTTCAACT  
P E V T C V V V D V S H E D P E V K F N>

1510 1520 1530 1540 1550 1560  
GGTACGTGGACGGCGTGGAGGTGCATAATGCCAAGACAAAGCCGCGGGAGGAGCAGTACA  
W Y V D G V E V H N A K T K P R E E Q Y>

1570 1580 1590 1600 1610 1620  
ACAGCACGTACCGTGTGGTCAGCGTCCTCACCGTCCTGCACCAGGACTGGCTGAATGGCA  
N S T Y R V V S V L T V L H Q D W L N G>

1630 1640 1650 1660 1670 1680  
AGGAGTACAAGTGCAAGGTCTCCAACAAAGCCCTCCCAGCCCCATCGAGAAAACCATCT  
K E Y K C K V S N K A L P A P I E K T I>

1690 1700 1710 1720 1730 1740  
CCAAAGCCAAAGGTGGGACCCGTGGGGTGCAGGGCCACATGGACAGAGGCCGGCTCGGC  
S K A K>

1750 1760 1770 1780 1790 1800  
CCACCCTCTGCCCTGAGAGTGACCGCTGTACCAACCTCTGTCCCTACAGGGCAGCCCCGA  
G Q P R>

1810 1820 1830 1840 1850 1860  
GAACCACAGGTGTACACCCTGCCCCATCCCGGGATGAGCTGACCAAGAACCAGGTCAGC  
E P Q V Y T L P P S R D E L T K N Q V S>

1870 1880 1890 1900 1910 1920  
CTGACCTGCCTGGTCAAAGGCTTCTATCCCAGCGACATCGCCGTGGAGTGGGAGAGCAAT  
L T C L V K G F Y P S D I A V E W E S N>

1930 1940 1950 1960 1970 1980  
GGGCAGCCGGAGAACAACACTACAAGACCACGCCTCCCGTGTGGACTCCGACGGCTCCTTC  
G Q P E N N Y K T T P P V L D S D G S F>

1990 2000 2010 2020 2030 2040  
TTCCTCTACAGCAAGCTCACCGTGGACAAGAGCAGGTGGCAGCAGGGGAACGTCTTCTCA  
F L Y S K L T V D K S R W Q Q G N V F S>

2050 2060 2070 2080 2090 2100  
TGCTCCGTGATGCATGAGGCTCTGCACAACCACTACACGCAGAAGAGCCTCTCCTTAAGT  
C S V M H E A L H N H Y T Q K S L S L S>

2110 2120 2130 2140 2150 2160  
CCGGGAAAATAATCTAGAAGCTCGCTGATCAGCCTCGACTGTGCCTTCTAGTTGCCAGCC  
P G K>

2170 2180 2190 2200 2210 2220  
ATCTGTTGTTTGGCCCTCCCCCGTGCCTTCCTTGACCCTGGAAGGTGCCACTCCCCTGT

2230 2240 2250 2260 2270 2280  
CCTTTCCTAATAAAATGAGGAAATTGCATCGCATTGTCTGAGTAGGTGTCATTCTATTCT

2290 2300 2310 2320 2330 2340  
GGGGGGTGGGGTGGGGCAGGACAGCAAGGGGGAGGATTGGGAAGACAATAGCAGGCATGC

2350 2360 2370 2380 2390 2400  
TGGGGATGGCCCGGGCTCTATGGCTTCTGAGGCGGAAAGAACCAGCTGGGGCTCTAGGGG

2410 2420 2430 2440 2450 2460  
GTATCCCCACGCGCCCTGTAGCGGCGCATTAAGCGCGGGGTGTGGTGGTTACGCGCAG

2470 2480 2490 2500 2510 2520  
CGTGACCGCTACACTTGCCAGCGCCCTAGCGCCCGCTCCTTTTCGCTTTCTTCCCTTCCTT

2530 2540 2550 2560 2570 2580  
TCTCGCCACGTTTCGCCGGCTTTCCCCGTCAAGCTCTAAATCGGGGCATCCCTTTAGGGTT

2590 2600 2610 2620 2630 2640  
CCGATTTAGTGCTTTACGGCACCTCGACCCCAAAAACTTGATTAGGGTGATGGTTCACG

2650 2660 2670 2680 2690 2700  
TAGTGGGCCATCGCCCTGATAGACGGTTTTTCGCCCTTTGACGTTGGAGTCCACGTTCTT

2710 2720 2730 2740 2750 2760  
TAATAGTGGACTCTTGTTCCAAACTGGAACAACACTCAACCCTATCTCGGTCTATTCTTT

2770 2780 2790 2800 2810 2820  
TGATTTATAAGGGATTTTGGGGATTTTCGGCCTATTGGTTAAAAAATGAGCTGATTTAACA

2830 2840 2850 2860 2870 2880  
AAAATTTAACGCGAATTAATTCTGTGGAATGTGTGTCAGTTAGGGTGTGGAAAGTCCCCA

2890 2900 2910 2920 2930 2940  
GGCTCCCCAGGCAGGCAGAAGTATGCAAAGCATGCATCTCAATTAGTCAGCAACCAGGTG

2950 2960 2970 2980 2990 3000  
TGGAAGTCCCCAGGCTCCCCAGCAGGCAGAAGTATGCAAAGCATGCATCTCAATTAGTC

3010 3020 3030 3040 3050 3060  
AGCAACCATAGTCCC GCCCTAACTCCGCCATCCCGCCCCTAACTCCGCCCAGTTCCGC

3070 3080 3090 3100 3110 3120  
CCATTCTCCGCCCTAGGCTGACTAATTTTTTTTTATTTATGCAGAGGCCGAGGCCGCCTC

3130 3140 3150 3160 3170 3180  
TGCCTCTGAGCTATTCCAGAAGTAGTGAGGAGGCTTTTTTTGGAGGCCTAGGCTTTTGCAA

3190 3200 3210 3220 3230 3240  
AAAGCTCCCGGGAGGTCCACAATGATTGAACAAGATGGATTGCACGCAGGTTCTCCGGCC

3250 3260 3270 3280 3290 3300  
GCTTGGGTGGAGAGGCTATTCGGCTATGACTGGGCACAACAGACAATCGGCTGCTCTGAT

3310 3320 3330 3340 3350 3360  
GCCGCCGTGTTCCGGCTGTCAGCGCAGGGGCGCCCGGTTCTTTTTGTCAAGACCGACCTG

3370 3380 3390 3400 3410 3420  
TCCGGTGCCTGAATGAACTCCAGGACGAGGCAGCGCGGCTATCGTGGCTGGCCACGACG

3430 3440 3450 3460 3470 3480  
GGCGTTTCCTTGCGCAGCTGTGCTCGACGTTGTCACTGAAGCGGGAAGGGACTGGCTGCTA

3490 3500 3510 3520 3530 3540  
TTGGGCGAAGTGCCGGGGCAGGATCTCCTGTCTCATCTCACCTTGCTCCTGCCGAGAAAGTA

3550 3560 3570 3580 3590 3600  
TCCATCATGGCTGATGCAATGCGGCGGCTGCATACGCTTGATCCGGCTACCTGCCCATTC

3610 3620 3630 3640 3650 3660  
GACCACCAAGCGAAACATCGCATCGAGCGAGCACGTACTCGGATGGAAGCCGGTCTTGTC

3670 3680 3690 3700 3710 3720  
GATCAGGATGATCTGGACGAAGAGCATCAGGGGCTCGCGCCAGCCGAAGTTCGCCAGG

3730 3740 3750 3760 3770 3780  
CTCAAGGCGCGTATGCCCGACGGCGAGGATCTCGTCGTGACTCATGGCGATGCCTGCTTG

3790 3800 3810 3820 3830 3840  
CCGAATATCATGGTGGAAAATGGCCGCTTTTCTGGATTCATCGACTGTGGCCGGCTGGGT

3850 3860 3870 3880 3890 3900  
GTGGCGGACCGCTATCAGGACATAGCGTTGGCTACCCGTGATATTGCTGAAGAGCTTGGC

3910 3920 3930 3940 3950 3960  
GGCGAATGGGCTGACCGCTTCCTCGTGCTTTACGGTATCGCCGCTCCCGATTTCGACGCGC

3970 3980 3990 4000 4010 4020  
ATCGCCTTCTATCGCCTTCTTGACGAGTTCTTCTGAGCGGGACTCTGGGGTTCGAAATGA

4030 4040 4050 4060 4070 4080  
CCGACCAAGCGACGCCAACCTGCCATCACGAGATTTTCGATTCCACCGCCGCTTCTATG

4090 4100 4110 4120 4130 4140  
AAAGGTTGGGCTTCGGAATCGTTTTCCGGGACGCCGGCTGGATGATCCTCCAGCGCGGGG

4150 4160 4170 4180 4190 4200  
ATCTCATGCTGGAGTTCTTCGCCCACCCCAACTTGTTTATTGCAGCTTATAATGGTTACA

4210 4220 4230 4240 4250 4260  
AATAAAGCAATAGCATCACAAATTTACAAATAAAGCATTTTTTTTCACTGCATTCTAGTT

4270 4280 4290 4300 4310 4320  
GTGGTTTGTCCAAACTCATCAATGTATCTTATCATGTCTGTATAACCGGATCTTTCGCTT

4330 4340 4350 4360 4370 4380  
CCTCGCTCACTGACTCGCTGCGCTCGGTCGTTTCGGCTGCGGCGAGCGGTATCAGCTCACT

4390 4400 4410 4420 4430 4440  
CAAAGGCGGTAATACGGTTATCCACAGAATCAGGGGATAACGCAGGAAAGAACATGTGAG

4450 4460 4470 4480 4490 4500  
CAAAAGGCCAGCAAAGGCCAGGAACCGTAAAAAGGCCGCGTTGCTGGCGTTTTTCCATA

4510 4520 4530 4540 4550 4560  
GGCTCCGCCCCCTGACGAGCATCACAAAATCGACGCTCAAGTCAGAGGTGGCGAAACC

4570 4580 4590 4600 4610 4620  
CGACAGGACTATAAAGATACCAGGCGTTTTCCCCTGGAAGCTCCCTCGTGCCTCTCCTG

4630 4640 4650 4660 4670 4680  
TTCCGACCCTGCCGCTTACCGGATACCTGTCCGCTTTCTCCCTTCGGGAAGCGTGGCGC

4690 4700 4710 4720 4730 4740  
TTTCTCAATGCTCACGCTGTAGGTATCTCAGTTCGGTGTAGGTCGTTTCGCTCCAAGCTGG

4750 4760 4770 4780 4790 4800  
GCTGTGTGCACGAACCCCCGTTACGCCCCGACCGCTGCGCCTTATCCGGTAACTATCGTC

4810 4820 4830 4840 4850 4860  
TTGAGTCCAACCCGGTAAGACACGACTTATCGCCACTGGCAGCAGCCACTGGTAACAGGA

4870 4880 4890 4900 4910 4920  
TTAGCAGAGCGAGGTATGTAGGCGGTGCTACAGAGTTCCTTGAAGTGGTGGCCTAACTACG

4930 4940 4950 4960 4970 4980  
GCTACACTAGAAGGACAGTATTTGGTATCTGCGCTCTGCTGAAGCCAGTTACCTTCGGAA

4990 5000 5010 5020 5030 5040  
AAAGAGTTGGTAGCTCTTGATCCGGCAAACAAACCACCGCTGGTAGCGGTGGTTTTTTTG

5050 5060 5070 5080 5090 5100  
TTTGCAAGCAGCAGATTACGCGCAGAAAAAAGGATCTCAAGAAGATCCTTTGATCTTTT

5110 5120 5130 5140 5150 5160  
CTACGGGGTCTGACGCTCAGTGAACGAAAACCTCACGTTAAGGGATTTTGGTCATGAGAT

5170 5180 5190 5200 5210 5220  
TATCAAAAAGGATCTTCACCTAGATCCTTTTAAATTAATAAATGAAGTTTTAAATCAATCT

5230 5240 5250 5260 5270 5280  
AAAGTATATATGAGTAAACTTGGTCTGACAGTTACCAATGCTTAATCAGTGAGGCACCTA

5290 5300 5310 5320 5330 5340  
TCTCAGCGATCTGTCTATTTTCGTTTCATCCATAGTTGCCTGACTCCCCGTCGTGTAGATAA

5350 5360 5370 5380 5390 5400  
CTACGATACGGGAGGGCTTACCATCTGGCCCCAGTGCTGCAATGATACCGCGAGACCCAC

5410 5420 5430 5440 5450 5460  
GCTCACCGGCTCCAGATTTATCAGCAATAAACCAGCCAGCCGGAAGGGCCGAGCGCAGAA

5470 5480 5490 5500 5510 5520  
GTGGTCTGCAACTTTATCCGCTCCATCCAGTCTATTAATTGTTGCCGGAAGCTAGAG

5530 5540 5550 5560 5570 5580  
TAAGTAGTTCGCCAGTTAATAGTTTTCGCAACGTTGTTGCCATTGCTACAGGCATCGTGG

5590 5600 5610 5620 5630 5640  
TGTCACGCTCGTCGTTTGGTATGGCTTCATTCAGCTCCGGTTCCCAACGATCAAGGCGAG

5650 5660 5670 5680 5690 5700  
TTACATGATCCCCATGTTGTGCAAAAAAGCGGTTAGCTCCTTCGGTCTCCGATCGTTG

5710 5720 5730 5740 5750 5760  
TCAGAAGTAAGTTGGCCGAGTGTATCACTCATGGTTATGGCAGCACTGCATAATTCTC

5770 5780 5790 5800 5810 5820  
TTACTGTCATGCCATCCGTAAGATGCTTTTCTGTGACTGGT GAGTACTCAACCAAGTCAT

5830 5840 5850 5860 5870 5880  
TCTGAGAATAGTGTATGCGGCGACCGAGTTGCTCTTGCCCGCGTCAATACGGGATAATA

5890 5900 5910 5920 5930 5940  
CCGCGCCACATAGCAGAACTTTAAAAGTGCTCATCATTGGAAAACGTTCTTCGGGGCGAA

5950 5960 5970 5980 5990 6000  
AACTCTCAAGGATCTTACCGCTGTTGAGATCCAGTTCGATGTAACCCACTCGTGCACCCA

6010 6020 6030 6040 6050 6060  
ACTGATCTTCAGCATCTTTTACTTTTACCAGCGTTTCTGGGTGAGCAAAAACAGGAAGGC

6070 6080 6090 6100 6110 6120  
AAAATGCCGCAAAAAGGGAATAAGGGCGACACGGAAATGTTGAATACTCATACTCTTCC

6130 6140 6150 6160 6170 6180  
TTTTTCAATATTATTGAAGCATTTATCAGGGTTATTGTCTCATGAGCGGATACATATTTG

6190 6200 6210 6220 6230 6240  
AATGTATTTAGAAAAATAAACAAATAGGGGTTCCGCGCACATTTCCCCGAAAAGTGCCAC

6250 6260 6270 6280 6290 6300  
CTGACGTCAGATCGACGGATCGGGAGATCAGGTACCGAATTCAAGCTTCGTGAGGCTCCG

6310 6320 6330 6340 6350 6360  
GTGCCCGTCAGTGGGCAGAGCGCACATCGCCACAGTCCCCGAGAAGTTGGGGGGAGGGG

6370 6380 6390 6400 6410 6420  
TCGGCAATTGAACCGGTGCCTAGAGAAGGTGGCGCGGGGTAAACTGGGAAAGTGATGTGC

6430 6440 6450 6460 6470 6480  
TGTA CTGGCTCCGCCTTTTTCCCGAGGGTGGGGGAGAACCGTATATAAGTGCAGTAGTCCG

6490 6500 6510 6520 6530 6540  
CCGTGAACGTTCTTTTTCGCAACGGGTTTGCCGCCAGAACACAGGTAAGTGCCGTGTGTG

6550 6560 6570 6580 6590 6600  
GTTCCCGCGGGCCTGGCCTCTTTACGGGTTATGGCCCTTGCGTGCCTTGAATTACTTCCA

6610 6620 6630 6640 6650 6660  
CCTGGCTCCAGTACGTGATTCTTGATCCCAGCTGGAGCCAGGGGCGGGCCTTGCGCTTT

6670 6680 6690 6700 6710 6720  
AGGAGCCCCCTTCGCCTCGTGCTTGAGTTGAGGCCTGGCCTGGGCGCTGGGGCCGCCGCT

6730 6740 6750 6760 6770 6780  
GCGAATCTGGTGGCACCTTCGCGCCTGTCTCGCTGCTTTTCGATAAGTCTCTAGCCATTTA

6790 6800 6810 6820 6830 6840  
AAATTTTTGATGACCTGCTGCGACGCTTTTTTCTGGCAAGATAGTCTTGTAATGCGGG

6850 6860 6870 6880 6890 6900  
CCAGGATCTGCACACTGGTATTTTCGGTTTTTGGGCCCGCGGCCGGCGACGGGGCCCGTGC

6910 6920 6930 6940 6950 6960  
GTCCCAGCGCACATGTTTCGGCGAGGCGGGCCTGCGAGCGCGGCCACCGAGAATCGGACG

6970 6980 6990 7000 7010 7020  
GGGGTAGTCTCAAGCTGGCCGGCCTGCTCTGGTGCCTGGCCTCGCGCCGCCGTGTATCGC

7030 7040 7050 7060 7070 7080  
CCCCCCTGGGCGGCAAGGCTGGCCCGTCCGGCACCAGTTGCGTGAGCGGAAAGATGGCC

7090 7100 7110 7120 7130 7140  
GCTTCCCGGCCCTGCTCCAGGGGGCTCAAATGGAGGACGCGGCGCTCGGGAGAGCGGGC

7150 7160 7170 7180 7190 7200  
GGGTGAGTCACCCACACAAAGGAAAAGGGCCTTTCCGTCCTCAGCCGTCGCTTCATGTGA

7210 7220 7230 7240 7250 7260  
CTCCACGGAGTACCGGGCGCCGTCCAGGCACCTCGATTAGTTCTGGAGCTTTTGGAGTAC

7270 7280 7290 7300 7310 7320  
GTCGTCTTTAGGTTGGGGGAGGGGTTTTATGCGATGGAGTTTCCCCACACTGAGTGGGT

7330 7340 7350 7360 7370 7380  
GGAGACTGAAGTTAGGCCAGCTTGGCACTTGATGTAATTCTCCTTGGAATTTGGCCTTTT

7390 7400 7410 7420 7430 7440  
TGAGTTTGGATCTTGGTTCATTCTCAAGCCTCAGACAGTGGTTCAAAGTTTTTTTCTTCC

7450 7460 7470 7480 7490 7500  
ATTTACAGGTGTCGTGAACACGTGGCCACCATGGGATGGAGCTGTATCATCCTCTTCTTGG

7510 7520 7530 7540 7550 7560  
TAGCAACAGCTACAGGTAAGGGGTTAACAGTAGCAGGCTTGAGGTCTGGACATATATATG

7570 7580 7590 7600  
GGTGACAATGACATCCACTTTGCCTTTCTCTCCACAGGCGCGCACTCC

**Supplementary Table 1. The number of cell surface CD7 molecules on cell lines**

| Cell line | Number of cell surface CD7 molecules |
|-----------|--------------------------------------|
| A549      | 99                                   |
| A549-CD7  | 144,000                              |
| MOLT4     | 10,900                               |
| Jurkat    | 7960                                 |
| KOPT-KI   | 21,400                               |

The number of cell surface CD7 molecules was estimated using BD Quantibrite Beads

**Supplementary Table 2: Reduction and conjugation conditions used to generate CD7-PEG4-Val-Cit-PAB-MMAE**

| <b>Reduction Step (2 hours at 25 °C)</b>                         |                 |                                     |
|------------------------------------------------------------------|-----------------|-------------------------------------|
| <i>Component</i>                                                 | <i>Volume</i>   | <i>Final Concentration</i>          |
| CD7 (96.4 $\mu$ M, 14.48 mg/mL) in PBS + 4 mM EDTA, pH 7.40      | 1.15 mL         | 73.9 $\mu$ M                        |
| TCEP (40 mM) in in PBS + 4 mM EDTA, pH 7.40                      | 8.3 $\mu$ L     | 221.3 $\mu$ M (3 molar equivalents) |
| PBS + 4 mM EDTA, pH 7.40                                         | 342 $\mu$ L     | N/A                                 |
| <b>Total volume</b>                                              | <b>1.5 mL</b>   |                                     |
| <b>Conjugation Step (21 hours at 25 °C)</b>                      |                 |                                     |
| <i>Component</i>                                                 | <i>Volume</i>   | <i>Final Concentration</i>          |
| Partially reduced CD7 (73.9 $\mu$ M) in PBS + 4 mM EDTA, pH 7.40 | 1.5 mL          | 66.5 $\mu$ M                        |
| Dimethylacetamide (DMA)                                          | 67 $\mu$ L      | 10% (v/v)                           |
| PermaLink-PEG4-Val-Cit-PAB-MMAE (25 mM) in DMA                   | 100 $\mu$ L     | 1.5 mM (22.5 molar equivalents)     |
| <b>Total volume</b>                                              | <b>1.667 mL</b> |                                     |

**Supplementary Table 3: PLRP-HPLC method information**

| <b>PLRP-HPLC method information</b> |                                                                                                 |                    |
|-------------------------------------|-------------------------------------------------------------------------------------------------|--------------------|
| <i>Component</i>                    | <i>Parameter</i>                                                                                |                    |
| Sample preparation                  | ADC was incubated for 15 min at 37 °C in the presence of 2 mM DTT immediately prior to analysis |                    |
| Column                              | PLRP-S (Agilent, 1000 Å, 5 µm, 50 x 2.1 mm)                                                     |                    |
| Column temperature                  | 80 °C                                                                                           |                    |
| Flow rate                           | 0.75 mL/min                                                                                     |                    |
| Injection Volume                    | 20 µL                                                                                           |                    |
| Detection                           | A280 nm and A254 nm                                                                             |                    |
| Mobile phase A                      | 0.1% (v/v) TFA in deionised water                                                               |                    |
| Mobile phase B                      | 0.1% (v/v) TFA in Acetonitrile                                                                  |                    |
| Gradient                            | Time (min)                                                                                      | Mobile phase B (%) |
|                                     | 0                                                                                               | 25                 |
|                                     | 3                                                                                               | 25                 |
|                                     | 28                                                                                              | 50                 |
|                                     | 29                                                                                              | 95                 |
|                                     | 31                                                                                              | 95                 |
|                                     | 33                                                                                              | 25                 |
|                                     | 42                                                                                              | 25                 |

**Supplementary Table 4: Reduction and conjugation conditions used to generate Herceptin-PEG4-Val-Cit-PAB-MMAE**

| <b>Reduction Step (2 hours at 25 °C)</b>                               |                              |                                     |
|------------------------------------------------------------------------|------------------------------|-------------------------------------|
| <i>Component</i>                                                       | <i>Volume</i>                | <i>Final Concentration</i>          |
| Herceptin (79 $\mu$ M, 11.9 mg/mL) in PBS + 4 mM EDTA, pH 7.40         | 200 $\mu$ L                  | 44.2 $\mu$ M                        |
| TCEP (21.4 mM) in in PBS + 4 mM EDTA, pH 7.40                          | 2.2 $\mu$ L                  | 131.9 $\mu$ M (3 molar equivalents) |
| PBS + 4 mM EDTA, pH 7.40                                               | 154.8 $\mu$ L                | N/A                                 |
| <b>Total volume</b>                                                    | <b>357 <math>\mu</math>L</b> |                                     |
| <b>Conjugation Step (21 hours at 25 °C)</b>                            |                              |                                     |
| <i>Component</i>                                                       | <i>Volume</i>                | <i>Final Concentration</i>          |
| Partially reduced Herceptin (44.2 $\mu$ M) in PBS + 4 mM EDTA, pH 7.40 | 350 $\mu$ L                  | 39.8 $\mu$ M                        |
| Dimethylacetamide (DMA)                                                | 15.7 $\mu$ L                 | 10% (v/v)                           |
| PermaLink-PEG4-Val-Cit-PAB-MMAE (25 mM) in DMA                         | 23.3 $\mu$ L                 | 1.5 mM (38 molar equivalents)       |
| <b>Total volume</b>                                                    | <b>389 <math>\mu</math>L</b> |                                     |
